# Supplementary material
Source: PubMed Central journal article supplement (PMC5824290)
Supplement: jamaoncol-3-1204-s001.pdf [file jamaoncol-3-1204-s001.pdf]

## Supplementary Online Content

Bausch B, Schiavi F, Ni Y, et al; European-American-Asian Pheochromocytoma-Paranglioma Registry Study Group. Systematic clinical characterization of the pheochromocytoma and paraganglioma susceptibility genes *SDHA*, *TMEM127*, *MAX*, and *SDHAF2* for gene-informed prevention. *JAMA Oncol*. Published online April 6, 2017. doi:10.1001/jamaoncol.2017.0223

**eTable 1.** Germline Mutations in the *SDHA*, *TMEM127*, *MAX*, and *SDHAF2* Genes and Corresponding Phenotypes in 64 Unrelated Index Cases

**eTable 2.** Characteristics of Patients With Pheochromocytomas and Parangliomas With Germline Mutations in the *SDHA*, *TMEM127*, *MAX*, and *SDHAF2* Genes

This supplementary material has been provided by the authors to give readers additional information about their work.

**eTable 1. Germline Mutations in the *SDHA*, *TMEM127*, *MAX*, and *SDHAF2* Genes and Corresponding Phenotypes in 64 Unrelated Index Cases**

| Case                                                                         | Age /Sex | Family  | Paraganglionic                   | Clinical     | Nucleotide | Amino Acid | ACMG    |
|------------------------------------------------------------------------------|----------|---------|----------------------------------|--------------|------------|------------|---------|
| Nationality                                                                  |          | History | Phenotype                        | Predictors   | Change     | Change     | Variant |
|                                                                              |          |         |                                  | Suggesting   |            |            | Class   |
|                                                                              |          |         |                                  | Heritability |            |            |         |
| <b><i>SDHA</i> Germline Mutations (NCBI Reference Sequence: NM_004168.2)</b> |          |         |                                  |              |            |            |         |
| 1 GER                                                                        | 66 / M   | -       | Extraadrenal, thoracic           | 1            | c.1A>C     | p.Met1?    | 5       |
| 2 GER                                                                        | 30 / M   | -       | Adrenal, unilateral              | 1            | c.1A>T     | p. Met1?   | 5       |
| 3 GER                                                                        | 27 / F   | -       | Carotid                          | 2            | c.2T>G     | p.Met1?    | 5       |
| 4 GER                                                                        | 34 / M   | -       | Adrenal, unilateral              | 1            | c.3G>C     | p.Met1?    | 5       |
| 5 GER                                                                        | 15 / M   | -       | Adrenal, unilateral              | 1            | c.91C>T    | p.Arg31*   | 5       |
| 6 GER                                                                        | 36 / M   | +       | Extraadrenal,<br>retroperitoneal | 3            | c.91C>T    | p.Arg31*   | 5       |
| 7 GER                                                                        | 20 / F   | -       | Carotid                          | 2            | c.91C>T    | p.Arg31*   | 5       |
| 8 GER                                                                        | 37 / F   | -       | Carotid                          | 2            | c.91C>T    | p.Arg31*   | 5       |
| 9 GER                                                                        | 34 / F   | -       | Jugular                          | 2            | c.91C>T    | p.Arg31*   | 5       |
| 10 SWE                                                                       | 20 / F   | -       | Extraadrenal,<br>retroperitoneal | 2            | c.223C>T   | p.Arg75*   | 5       |
| 11 SWE                                                                       | 47 / M   | -       | Adrenal, unilateral              | 0            | c.223C>T   | p.Arg75*   | 5       |
| 12 GER                                                                       | 47 / F   | -       | Jugular                          | 1            | c.296A>G   | p.His99Arg | 5       |

|    |     |        |   |                                  |   |                      |                 |   |
|----|-----|--------|---|----------------------------------|---|----------------------|-----------------|---|
| 13 | GER | 26 / F | - | Jugular                          | 2 | c.457-1G>A           | p.?             | 5 |
| 14 | TUR | 17 / M | - | Extraadrenal,<br>retroperitoneal | 2 | c.566G>A             | p.Cys189Tyr     | 4 |
| 15 | GER | 43 / M | - | Carotid                          | 1 | c.622T>C             | p.Ser208Pro     | 4 |
| 16 | SWE | 64 / M | - | Adrenal, unilateral              | 0 | c.629G>A             | p.Arg210Gln     | 3 |
| 17 | GER | 53 / M | - | Jugular                          | 1 | c.778G>A             | p.Gly260Arg     | 4 |
| 18 | USA | 33 / M | - | Extraadrenal, pelvic             | 2 | c.820G>A             | p.Gly274Ser     | 5 |
| 19 | POL | 27 / F | - | Adrenal, unilateral              | 1 | c.830C>T             | p.Thr277Met     | 3 |
| 20 | GER | 46 / F | - | Jugular                          | 1 | c.940G>A             | p.Glu314Lys     | 4 |
| 21 | GER | 24 / M | - | Adrenal, unilateral              | 1 | c.1115C>G            | p.Pro372Arg     | 3 |
| 22 | GER | 63 / F | - | Carotid                          | 1 | c.1177G>A            | p.Val393Met     | 3 |
| 23 | GER | 58 / M | - | Adrenal, bilateral               | 2 | c.1283_1298del       | p.Gln428Profs*3 | 5 |
|    |     |        |   |                                  |   |                      | 7               |   |
| 24 | USA | 30 / F | - | Extraadrenal, pelvic             | 2 | c.1316G>A            | p.Gly439Glu     | 4 |
| 25 | GER | 20 / F | - | Jugular                          | 2 | c.1334C>T            | p.Ser445Leu     | 5 |
| 26 | GER | 48 / M | - | Carotid, bilateral               | 1 | C.1340A>G            | p.His447Arg     | 5 |
| 27 | GER | 49 / M | - | Jugular                          | 1 | c.1361C>A            | p.Ala454Glu     | 4 |
| 28 | USA | 28 / M | - | Adrenal, unilateral,<br>maligne  | 3 | c.1361C>A            | p.Ala454Glu     | 4 |
| 29 | GER | 44 / M | - | Extraadrenal,<br>retroperitoneal | 1 | c.1432_1432+1<br>del | p.?             | 5 |
| 30 | GER | 50 / F | - | Jugular                          | 1 | c.1766G>A            | p.Arg589Gln     | 5 |

|                                                                                 |     |        |   |                                               |   |            |             |   |
|---------------------------------------------------------------------------------|-----|--------|---|-----------------------------------------------|---|------------|-------------|---|
| 31                                                                              | USA | 65 / F | - | Carotid                                       | 1 | c.1799G>A  | p.Arg600Gln | 4 |
| 32                                                                              | GER | 49 / M | - | Extraadrenal,<br>retroperitoneal,<br>multiple | 2 | c.1799G>A  | p.Arg600Gln | 4 |
| 33                                                                              | TUR | 42 / F | - | Vagal                                         | 1 | c.1799G>A  | p.Arg600Gln | 4 |
| 34                                                                              | POL | 39 / M | - | Adrenal, unilateral                           | 1 | c.1979C>G  | p.Ala660Gly | 3 |
| <b><i>TMEM127</i> Germline Mutations (NCBI Reference Sequence: NM_017849.3)</b> |     |        |   |                                               |   |            |             |   |
| 35                                                                              | USA | 35 / F | - | Adrenal, unilateral                           | 1 | c.3G>A     | p.Met1?     | 5 |
| 36                                                                              | USA | 36 / M | - | Adrenal, unilateral                           | 1 | c.3G>A     | p.Met1?     | 5 |
| 37                                                                              | USA | 58 / F | - | Adrenal, unilateral                           | 0 | c.3G>A     | p.Met1?     | 5 |
| 38                                                                              | GER | 52 / F | + | Adrenal, unilateral                           | 1 | c.3G>A     | p.Met1?     | 5 |
| 39                                                                              | GER | 68 / M | - | Adrenal, unilateral                           | 0 | c.73A>T    | p.Lys25*    | 5 |
| 40                                                                              | POL | 43 / F | - | Adrenal, bilateral                            | 1 | c.131T>G   | p.Leu44Arg  | 4 |
| 41                                                                              | GER | 58 / F | - | Adrenal, unilateral                           | 0 | c.215T>A   | p.Leu72*    | 5 |
| 42                                                                              | GER | 34 / F | - | Carotid                                       | 2 | c.325T>C   | p.Ser109Pro | 4 |
| 43                                                                              | GER | 45 / M | - | Adrenal, bilateral                            | 1 | c.410-1G>C | p.?         | 5 |
| 44                                                                              | GER | 66 / M | - | Extraadrenal,<br>retroperitoneal              | 1 | c.413T>G   | p.Leu138Pro | 4 |
| 45                                                                              | HUN | 22 / F | - | Adrenal, bilateral                            | 2 | c.419G>A   | p.Cys140Tyr | 5 |
| 46                                                                              | GER | 76 / M | - | Adrenal, unilateral                           | 0 | c.462C>G   | p.Ile154Met | 4 |
| 47                                                                              | HUN | 51 / F | - | Adrenal, bilateral,                           | 3 | c.464T>A   | p.Leu155*   | 5 |

| Carotid, maligne                                                     |        |   |                                                        |   |              |                       |   |
|----------------------------------------------------------------------|--------|---|--------------------------------------------------------|---|--------------|-----------------------|---|
| 48 GER                                                               | 26 / F | - | Adrenal, unilateral                                    | 1 | c.518T>C     | p.Phe173Ser           | 4 |
| 49 POL                                                               | 25 / F | - | Adrenal, unilateral                                    | 1 | c.532dup     | p.<br>Tyr178Leufs*48  | 5 |
| 50 ISR                                                               | 33 / F | + | Adrenal, bilateral                                     | 3 | c.543_555dup | p.<br>Ala186Argfs*44  | 5 |
| 51 TUR                                                               | 51 / F | - | Adrenal, bilateral<br>Extraadrenal,<br>retroperitoneal | 2 | c.553G>A     | p.Gly185Arg           | 4 |
| 52 GER                                                               | 50 / F | - | Tympanic                                               | 1 | c.568G>A     | p.Ala190Tyr           | 4 |
| 53 TUR                                                               | 26 / F | - | Adrenal, unilateral                                    | 1 | c.572del     | p.Thr191Argfs*1<br>16 | 5 |
| 54 HUN                                                               | 47 / F | - | Adrenal, bilateral                                     | 1 | c.572del     | p.Thr191Argfs*1<br>16 | 5 |
| 55 SWE                                                               | 55 / F | - | Adrenal, unilateral                                    | 0 | c.665C>T     | p.Ala222Val           | 3 |
| <b>MAX Germline Mutations (NCBI Reference Sequence: NM_002382.4)</b> |        |   |                                                        |   |              |                       |   |
| 56 GER                                                               | 36 / F | - | Adrenal, unilateral                                    | 1 | c.73C>T      | p.Arg25Trp            | 5 |
| 57 GER                                                               | 23 / F | - | Adrenal, unilateral                                    | 1 | c.146C>G     | p.Ser49*              | 5 |
| 58 GER                                                               | 38 / M | - | Adrenal, bilateral                                     | 2 | c.223C>T     | p.Arg75*              | 5 |
| 59 POL                                                               | 32 / F | - | Adrenal, unilateral                                    | 1 | c.223C>T     | p.Arg75*              | 5 |
| 60 POL                                                               | 36 / M | + | Adrenal, bilateral                                     | 3 | c.223C>T     | p.Arg75*              | 5 |
| 61 GER                                                               | 50 / F | + | Adrenal, bilateral                                     | 2 | c.242_243del | p.His81Profs*5        | 5 |

|                                                                               |        |   |                     |   |          |                 |   |
|-------------------------------------------------------------------------------|--------|---|---------------------|---|----------|-----------------|---|
| 62 GER                                                                        | 21 / M | - | Adrenal, unilateral | 1 | c.292dup | p.Gln98Profs*48 | 5 |
| 63 GER                                                                        | 26 / M | - | Adrenal, bilateral  | 2 | c.307G>T | p.Glu103*       | 5 |
| <b><i>SDHAF2</i> Germline Mutation (NCBI Reference Sequence: NM_017841.2)</b> |        |   |                     |   |          |                 |   |
| 64 USA                                                                        | 25 / F | + | Carotid, vagal      | 3 | c.232G>A | p.Gly78Arg      | 5 |

The information of the table represents the status before clinical surveillance imaging. Mutations are classified according to the variant classification system of the American College of Medical Genetics and Genomics (ACMG): class 3: variant of unknown clinical significance; class 4: likely pathogenic; class 5 certainly pathogenic. 58 index cases had certain (class 5) or likely pathogenic (class 4) mutations and six index cases DNA variants of unknown significance (class 3). The six cases (five *SDHA* and one *TMEM127*) with DNA variants of unknown clinical significance were not included in further analyses.

GER = Germany, SWE = Sweden, TUR = Turkey, USA = United States, POL = Poland, HUN = Hungary, ISR = Israel; Age = age at diagnosis; M = male, F = female; FH = family history for pheochromocytoma or paraganglioma. Clinical predictors suggesting heritability were a family history of pheochromocytomas and paragangliomas, age at diagnosis <40 years, more than one pheochromocytoma or paraganglioma, tumor location outside the adrenal glands, and malignant tumors; in case of more than two mutation carries the lowest and highest age at diagnosis was indicated.



**eTable 2. Characteristics of Patients With Pheochromocytomas and Paragangliomas With Germline Mutations in the *SDHA*, *TMEM127*, *MAX*, and *SDHAF2* Genes**

| Gene                                                        | <i>SDHA</i> | <i>SDHA</i><br>lit. <sup>11,26-28,30,32,34</sup> | <i>TMEM127</i> | <i>TMEM127</i><br>lit. <sup>13,22-26,31-33</sup> | <i>MAX</i>      | <i>MAX</i><br>lit. <sup>12,21,32,35</sup> | <i>SDHAF2</i> | <i>SDHAF2</i><br>lit. <sup>10,25,29</sup> |
|-------------------------------------------------------------|-------------|--------------------------------------------------|----------------|--------------------------------------------------|-----------------|-------------------------------------------|---------------|-------------------------------------------|
|                                                             | (n=38)      | (n=10)                                           | (n=29)         | (n=75)                                           | (n=11)          | (n=47)                                    | (n=1)         | (n=18)                                    |
| <b>Family history*</b>                                      | 3% (1/29)   | 13% (1/8)                                        | 10% (2/20)     | 23% (7/31)                                       | 25% (2/8)       | 14% (6/42)                                | 100% (1/1)    | 100% (2/2)                                |
| <b>Age at diagnosis<br/>(median)</b>                        | 8-76 (28)   | 20-64 (46)                                       | 18-76 (47)     | 16-72 (43)                                       | 18-50 (36)      | 13-80 (29)                                | 25            | 22-67 (32)                                |
| <b>&gt;1 Pheochromocytoma<br/>or paraganglioma</b>          | 9% (3/33)   | 11% (1/9)                                        | 39% (11/28)    | 37% (19/51)                                      | 82% (9/11)      | 52% (24/46)                               | 100% (1/1)    | 79% (15/18)                               |
| <b>Adrenal</b>                                              | 28% (8/29)  | 44% (4/9)                                        | 74% (20/27)    | 98% (51/52)                                      | 100%<br>(11/11) | 98% (46/47)                               | 0% (0/1)      | 14% (2/14)                                |
| <b>Bilateral adrenal</b>                                    | 4% (1/26)   | 0% (0/8)                                         | 37% (10/27)    | 38% (20/52)                                      | 73% (8/11)      | 46% (21/46)                               | 0% (0/1)      | 0% (0/2)                                  |
| <b>Extraadrenal-<br/>retroperitoneal or pelvic§</b>         | 27% (7/26)  | 11% (1/9)                                        | 4% (1/27)      | 0% (0/52)                                        | 9% (1/11)       | 0% (0/46)                                 | 0% (0/1)      | 0% (0/2)                                  |
| <b>Head and Neck<br/>Paraganglioma</b>                      | 44% (15/34) | 33% (3/9)                                        | 22% (6/27)     | 2% (1/47)                                        | 0% (0/11)       | 2% (1/47)                                 | 100% (1/1)    | 86% (12/24)                               |
| <b>Malignant<br/>pheochromocytoma and<br/>paraganglioma</b> | 12% (4/34)  | 0% (0/10)                                        | 10% (3/29)     | 0% (0/52)                                        | 9% (1/11)       | 2% (1/47)                                 | 0% (0/1)      | 0% (0/14)                                 |



The grey columns represent the results of the current study in comparison to all cases published in the literature (lit.) summarized in the white columns.

The numbers (n=index cases + mutation positive relatives) and the denominators in the columns may be different, because the denominators represent the number of mutation carriers for whom imaging information was available.

\*family history refers to index cases carrying a *SDHA*, *TMEM127*, *MAX* or *SDHAF2* germline mutation

§thoracic paraganglioma: only one patient of the current study (4%, 1/26) had an *SDHA* mutation and a thoracic paraganglioma. In the literature no *SDHA*, *TMEM127*, *MAX* and *SDHAF2* mutation carrier had a thoracic paraganglioma.
